# Supplementary material for: Association between Allergic Rhinitis and Regular Physical Activity in Adults: A Nationwide Cross-Sectional Study
Source: PubMed Central journal article supplement (PMC7459676; doi:10.3390/ijerph17165662), 2020-08-05
Supplement: ijerph-17-05662-s001.pdf [file ijerph-17-05662-s001.pdf]

## Supplementary

Table S1. Odds ratios for the association between physical activity and severity or persistence of non-allergic rhinitis

### Severity

|          | n (%)          |                           | Univariate          |          | Multivariate        |          |
|----------|----------------|---------------------------|---------------------|----------|---------------------|----------|
|          | Mild<br>n =175 | Moderate-severe<br>n = 49 | Odds ratio (95% CI) | <i>P</i> | Odds ratio (95% CI) | <i>P</i> |
| Vigorous | 26 (12.7)      | 9 (18.5)                  | 1.558 (0.620-3.916) | 0.342    | 1.588 (0.547-4.611) | 0.391    |
| Moderate | 17 (11.6)      | 3 (3.9)                   | 0.306 (0.114-0.821) | 0.019    | 0.267 (0.088-0.812) | 0.021    |
| Walking  | 79 (39.0)      | 18 (45.2)                 | 1.289 (0.594-2.798) | 0.516    | 1.161 (0.559-2.412) | 0.686    |

### Persistence

|          | n (%)                   |                      | Univariate          |          | Multivariate        |          |
|----------|-------------------------|----------------------|---------------------|----------|---------------------|----------|
|          | Intermittent<br>n = 177 | Persistent<br>n = 47 | Odds ratio (95% CI) | <i>P</i> | Odds ratio (95% CI) | <i>P</i> |
| Vigorous | 30 (15.6)               | 5 (6.8)              | 0.393 (0.104-1.476) | 0.164    | 0.357 (0.085-1.503) | 0.158    |
| Moderate | 18 (11.1)               | 2 (5.5)              | 0.467 (0.083-2.627) | 0.384    | 0.519 (0.093-2.891) | 0.451    |
| Walking  | 78 (39.9)               | 19 (41.9)            | 1.083 (0.494-2.373) | 0.840    | 0.940 (0.411-2.151) | 0.882    |

n = unweighted number of study population.

Table S2. Frequency analysis of allergen-specific IgE levels divided into six grades

*Dermatophagoides farinae*

|                 | n (%)     |           |           |           |           |           |          | P     |
|-----------------|-----------|-----------|-----------|-----------|-----------|-----------|----------|-------|
|                 | Total     | I         | II        | III       | IV        | V         | VI       |       |
| <b>Vigorous</b> |           |           |           |           |           |           |          |       |
| Yes             | 47 (100)  | 6 (5.2)   | 16 (31.5) | 13 (35.8) | 6 (16.6)  | 2 (4.2)   | 4 (6.8)  | 0.453 |
| No              | 194 (100) | 26 (13.5) | 54 (25.9) | 48 (29.3) | 29 (12.8) | 26 (12.3) | 11 (6.3) |       |
| <b>Moderate</b> |           |           |           |           |           |           |          |       |
| Yes             | 28 (100)  | 3 (13.0)  | 7 (21.9)  | 10 (40.5) | 3 (11.1)  | 3 (9.3)   | 2 (4.2)  | 0.926 |
| No              | 213 (100) | 29 (11.7) | 63 (27.7) | 51 (29.3) | 32 (13.9) | 25 (10.8) | 13 (6.6) |       |
| <b>Walking</b>  |           |           |           |           |           |           |          |       |
| Yes             | 107 (100) | 12 (11.0) | 35 (26.5) | 24 (31.7) | 16 (14.3) | 11 (7.9)  | 9 (8.6)  | 0.787 |
| No              | 134 (100) | 20 (12.7) | 35 (27.4) | 37 (29.7) | 19 (12.9) | 17 (12.9) | 6 (4.4)  |       |

**Dog**

|                 | n (%)    |           |           |          |         |       |       | P     |
|-----------------|----------|-----------|-----------|----------|---------|-------|-------|-------|
|                 | Total    | I         | II        | III      | IV      | V     | VI    |       |
| <b>Vigorous</b> |          |           |           |          |         |       |       |       |
| Yes             | 7 (100)  | 2 (22.6)  | 3 (43.9)  | 2 (33.5) | 0 (0)   | 0 (0) | 0 (0) | 0.717 |
| No              | 37 (100) | 14 (41.9) | 15 (35.4) | 7 (22.2) | 1 (0.5) | 0 (0) | 0 (0) |       |
| <b>Moderate</b> |          |           |           |          |         |       |       |       |
| Yes             | 7 (100)  | 3 (39.5)  | 3 (46.2)  | 1 (14.2) | 0 (0)   | 0 (0) | 0 (0) | 0.868 |
| No              | 37 (100) | 13 (38.8) | 15 (35.5) | 8 (25.2) | 1 (0.5) | 0 (0) | 0 (0) |       |
| <b>Walking</b>  |          |           |           |          |         |       |       |       |
| Yes             | 19 (100) | 5 (21.6)  | 10 (52.4) | 4 (25.9) | 0 (0)   | 0 (0) | 0 (0) | 0.255 |
| No              | 25 (100) | 11 (49.9) | 8 (26.7)  | 5 (22.7) | 1 (0.7) | 0 (0) | 0 (0) |       |

**Cockroach**

|                 | n (%)    |           |           |           |         |       |       | P     |
|-----------------|----------|-----------|-----------|-----------|---------|-------|-------|-------|
|                 | Total    | I         | II        | III       | IV      | V     | VI    |       |
| <b>Vigorous</b> |          |           |           |           |         |       |       |       |
| Yes             | 17 (100) | 8 (52.0)  | 7 (34.2)  | 2 (13.8)  | 0 (0)   | 0 (0) | 0 (0) | 0.899 |
| No              | 89 (100) | 33 (44.7) | 40 (39.9) | 13 (13.6) | 3 (1.8) | 0 (0) | 0 (0) |       |
| <b>Moderate</b> |          |           |           |           |         |       |       |       |
| Yes             | 13 (100) | 6 (49.9)  | 5 (29.9)  | 2 (20.2)  | 0 (0)   | 0 (0) | 0 (0) | 0.835 |
| No              | 93 (100) | 35 (45.4) | 42 (40.0) | 13 (12.9) | 3 (1.7) | 0 (0) | 0 (0) |       |
| <b>Walking</b>  |          |           |           |           |         |       |       |       |
| Yes             | 45 (100) | 15 (38.5) | 22 (46.3) | 7 (14.0)  | 1 (1.3) | 0 (0) | 0 (0) | 0.654 |
| No              | 61 (100) | 26 (51.2) | 25 (33.7) | 8 (13.4)  | 2 (1.8) | 0 (0) | 0 (0) |       |

n = unweighted number of study population. IgE levels were divided into 6 grades: Grade I (0.35–0.69 kU/L), Grade II (0.70–3.49 kU/L), Grade III (3.50–17.49 kU/L), Grade IV (17.50–49.99 kU/L), Grade V (50.00–100.00 kU/L), and Grade VI (> 100.00 kU/L)
